# Supplementary material for: Divergent receptor proteins confer responses to different karrikins in two ephemeral weeds
Source: PubMed Central journal article supplement (PMC7062792; doi:10.1038/s41467-020-14991-w), 2020-03-09
Supplement: 41467_2020_14991_MOESM3_ESM.pdf [file 41467_2020_14991_MOESM3_ESM.pdf]

## **Description of Additional Supplementary Files**

File Name: Supplementary Data 1

Description: Analysis of KAI2 homologues identified from The 1000 Plant Transcriptomes Project
